# Supplementary material for: Development of Epirubicin-Loaded Biocompatible Polymer PLA–PEG–PLA Nanoparticles: Synthesis, Characterization, Stability, and In Vitro Anticancerous Assessment
Source: PubMed Central journal article supplement (PMC8070301; doi:10.3390/polym13081212), 2021-04-09

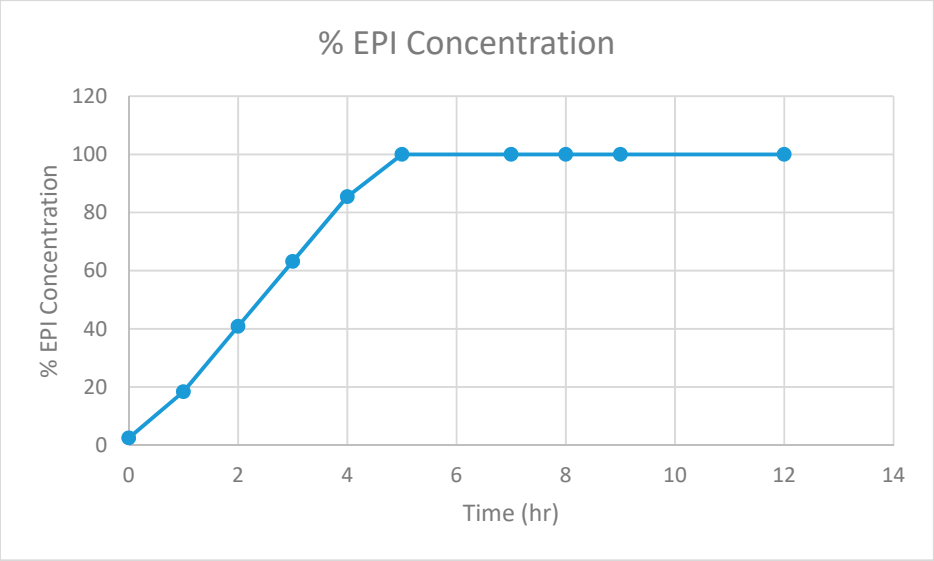

Supplement: polymers-13-01212-s001.pdf [file polymers-13-01212-s001.pdf]
